# Supplementary figures and images for: Plasmon resonances of GZO core–Ag shell nanospheres, nanorods, and nanodisks for biosensing and biomedical applications in near-infrared biological windows I and II
Source: Royal Society of Chemistry journal article supplement (doi:10.1039/d4cp00817k), 2024-01-01

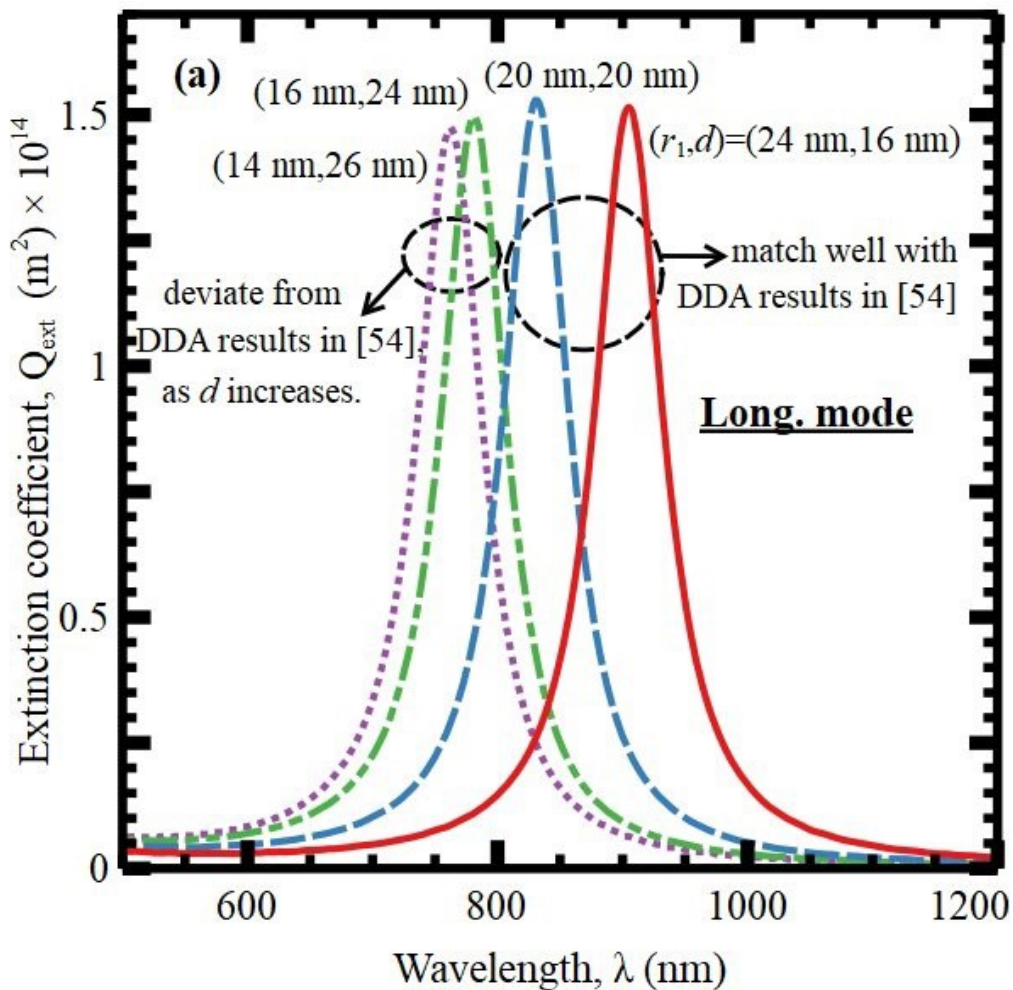

Supplement: d4cp00817k1.pdf [file d4cp00817k1.pdf]

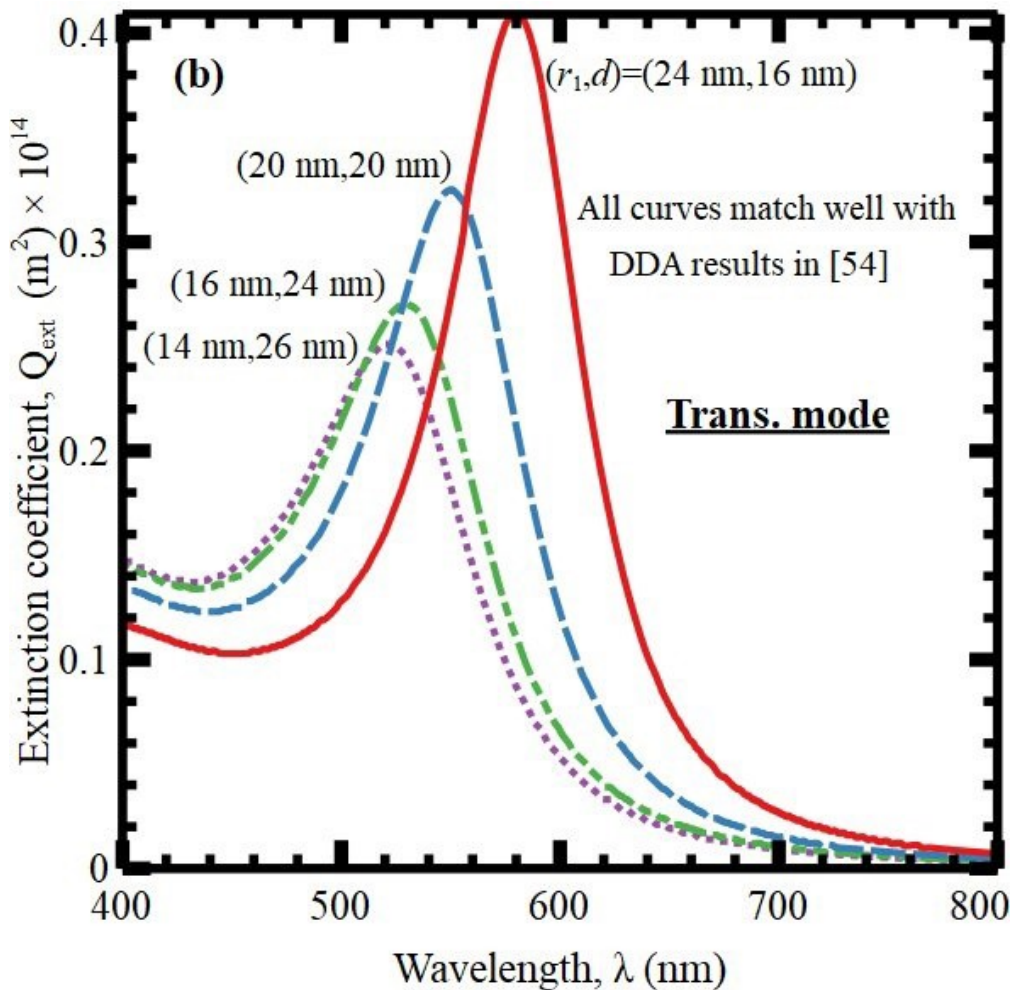

Supplement: d4cp00817k2.pdf [file d4cp00817k2.pdf]

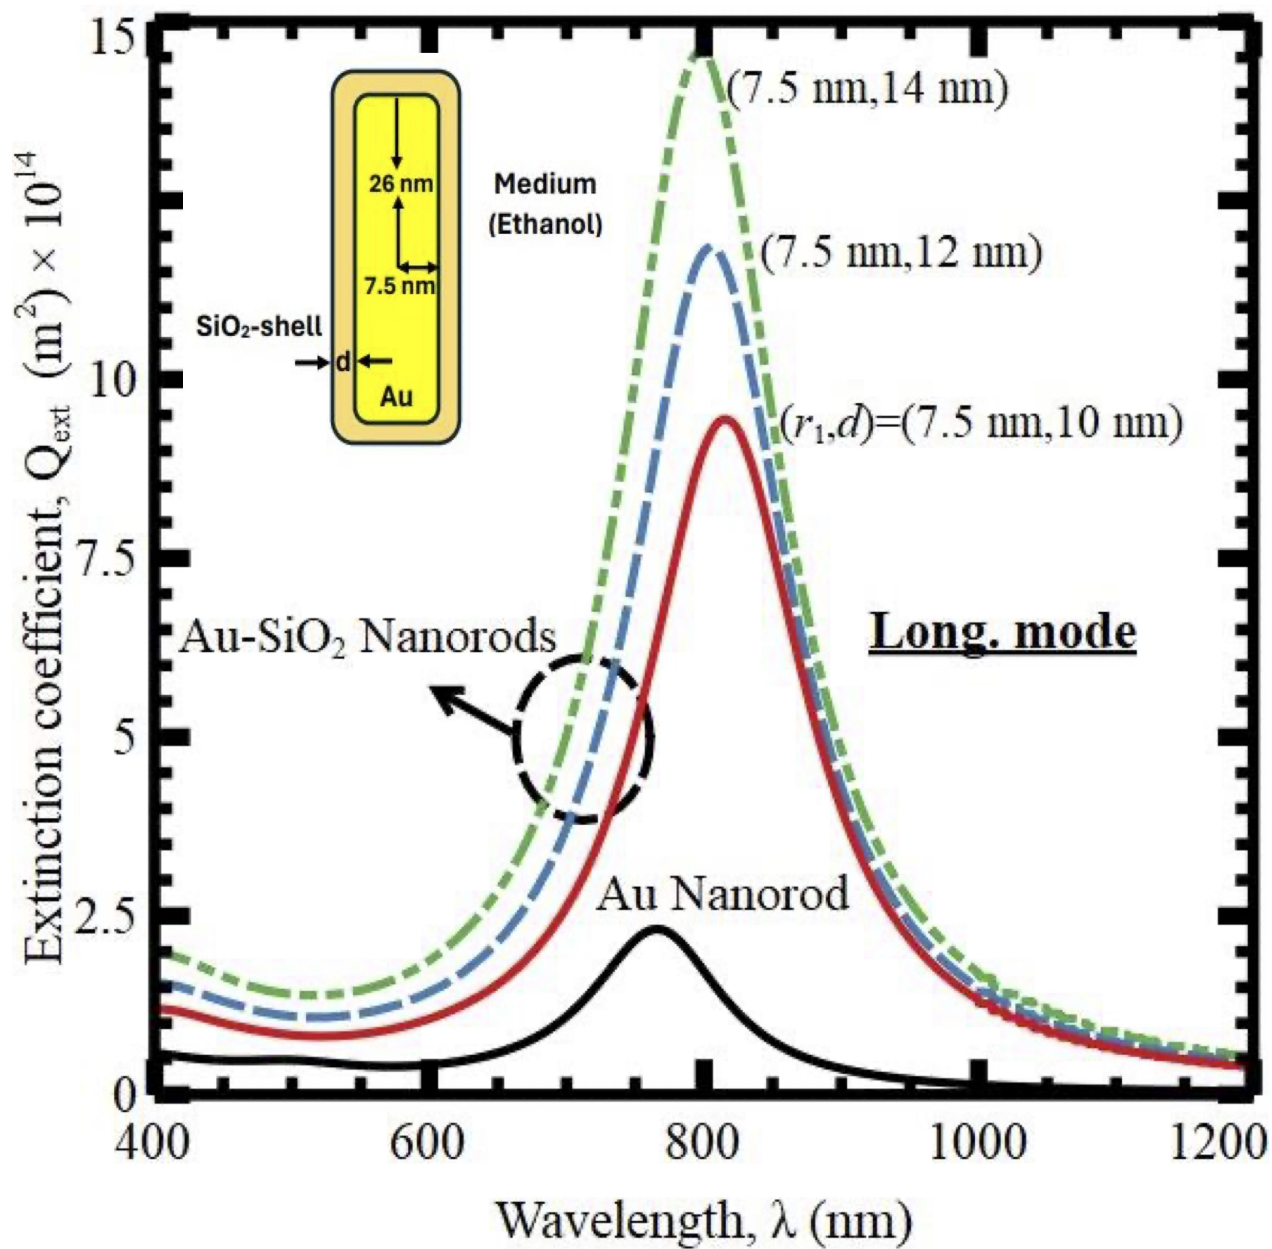

Supplement: d4cp00817k3.pdf [file d4cp00817k3.pdf]
